# Supplementary material
Source: PubMed Central journal article supplement (PMC8940775)
Supplement: mmc1-suppl.pdf [file mmc1-suppl.pdf]

## Supplementary Data

### A high-throughput radioactivity-based assay for screening SARS-CoV-2 nsp10-nsp16 complex

**Aliakbar Khalili Yazdi<sup>1</sup>, Fengling Li<sup>1</sup>, Kanchan Devkota<sup>1</sup>, Sumera Perveen<sup>1</sup>, Pegah Ghiabi<sup>1</sup>,  
Taraneh Hajian<sup>1</sup>, Albina Bolotokova<sup>1</sup> and Masoud Vedadi<sup>1,2\*</sup>**

<sup>1</sup> Structural Genomics Consortium, University of Toronto, Toronto, Ontario, M5G 1L7, Canada.

<sup>2</sup> Department of Pharmacology and Toxicology, University of Toronto, Toronto, Ontario, M5S  
1A8, Canada.

\*To whom correspondence should be addressed:

Masoud Vedadi; Tel.: 416-432-1980; E-mail: [m.vedadi@utoronto.ca](mailto:m.vedadi@utoronto.ca)

| <b>Table of contents:</b>                             | <b>Pages</b> |
|-------------------------------------------------------|--------------|
| Supplementary Scheme 1. Assay workflow                | 3            |
| Supplementary Fig. 1. Assay optimization              | 4            |
| Supplementary Fig. 2. Linearity of initial velocities | 5            |
| Supplementary Fig. 3. Screening of 76 chemical probes | 6            |
| Supplementary Table 1. Screening chemical probes      | 6            |

## Supplementary Scheme 1. Assay workflow.

1- Dispense 8  $\mu\text{L}$  of the starting **reaction mixture** (including, Tris-HCl (pH 7.5), KCl,  $\text{MgCl}_2$ , Triton-X-100, BSA, DTT, nsp10-nsp16 complex, and RNA) into the wells of 384-plates using a liquid-handling robot.

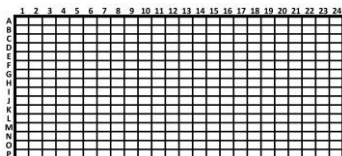

2- Add 1  $\mu\text{L}$  of the **10X compounds** using the liquid-handling robot.

3- Incubate the mixtures at the room temperature for 15 min.

4- Start the reactions by adding 1  $\mu\text{L}$  of **10X  $^3\text{H}$ -SAM** solution in each well using the liquid-handling robot.

5- Incubate the mixtures at the room temperature for 30 min to allow the enzymatic reaction to progress:

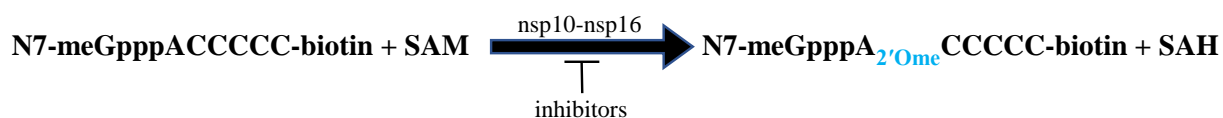

6- Stop the reactions and transfer the contents into SPA plates. Measure the signals.

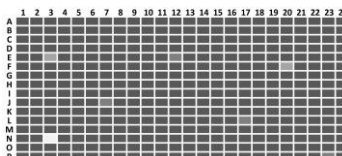

7- Calculate the percentage inhibition using Excel or GraphPad

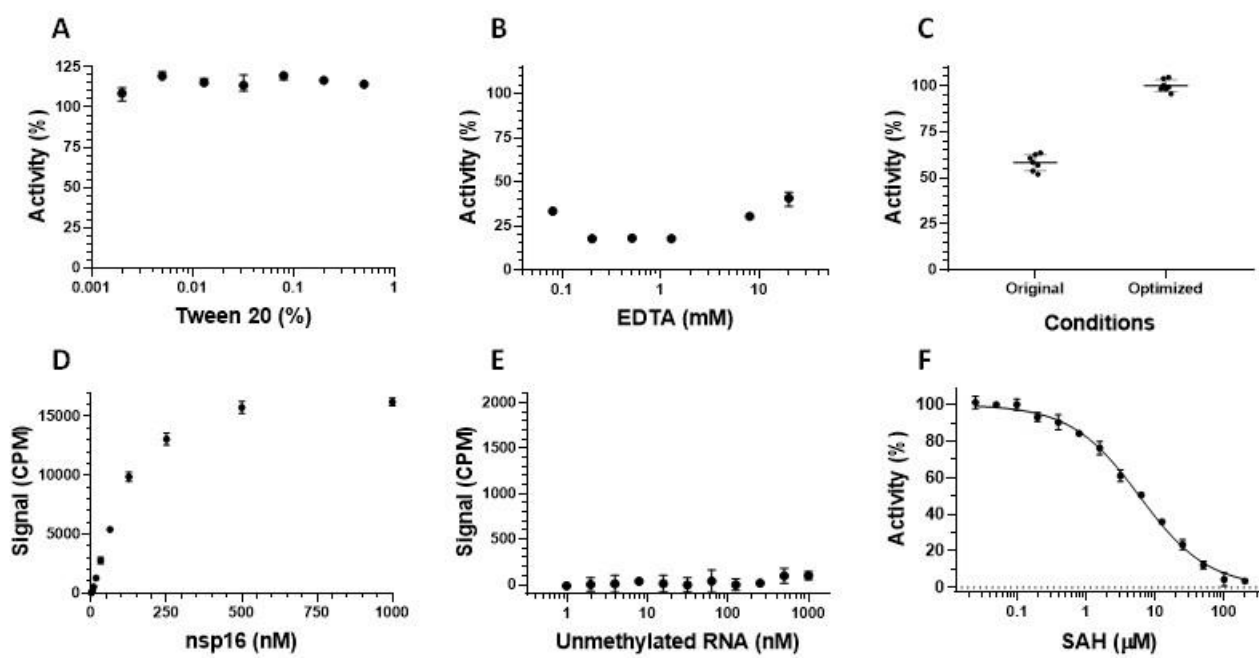

**Supplementary Figure 1. Assay optimization.** (A) Effect of Tween-20 on activity of nsp10-nsp16 complex. (B) The inhibitory effect of EDTA on nsp10-nsp16 at various concentrations. (C) Comparison of nsp10-nsp16 MTase activity in the original buffer (50 mM Tris pH 8.0, 1 mM MgCl<sub>2</sub>, and 5 mM DTT) versus the optimized buffer condition (50 mM Tris pH 7.5, 100 mM KCl, 1.5 mM MgCl<sub>2</sub>, 5 mM DTT, 0.01% BSA, 0.01% Triton X-100), in the presence of 2 μM RNA substrate, 5 μM SAM (16% <sup>3</sup>H-SAM), and 250 nM nsp16. (D) MTase activity at various concentrations of nsp10-nsp16 complex using N7-meGpppACCCCC RNA (Cap-0). (E) The N7-unmethylated RNA is not a substrate for nsp10-nsp16 complex; here reactions were performed in the presence of 125 nM nsp10-nsp16, 5 μM SAM and varying concentrations of N7-unmethylated RNA substrate (0.97 nM to 1 μM) for 30 minutes. (F) SAH inhibited nsp10-nsp16 with an IC<sub>50</sub> value of 5.9 ± 0.6 μM (Hill Slope: -0.9). The values in panel C are from seven independent experiments (n=7). All other experiments were performed in triplicate (n=3).

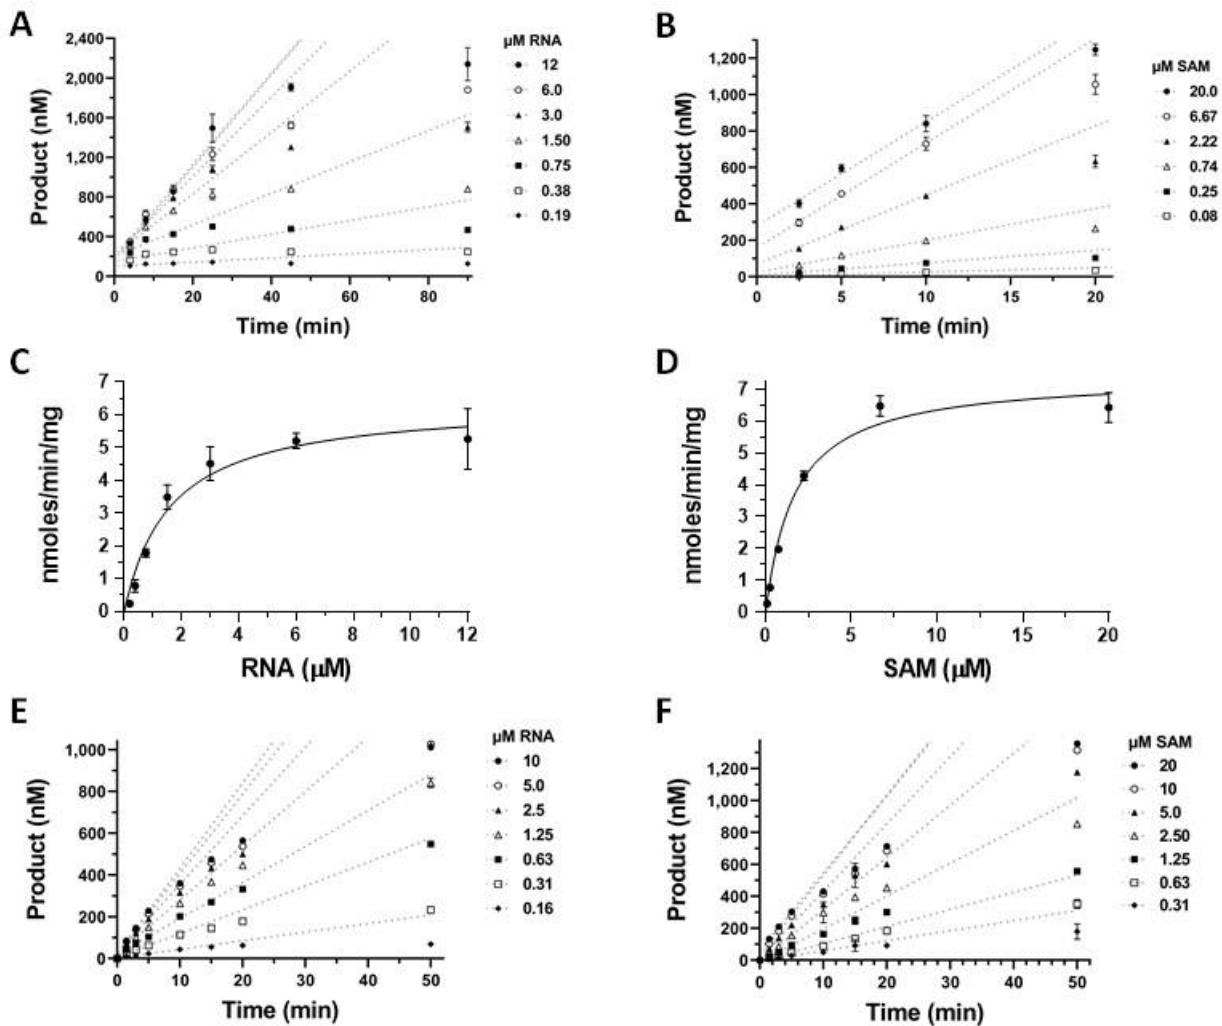

**Supplementary Figure 2. Linearity of initial velocities at 125 and 250 nM of nsp10-nsp16 complex.** The initial velocities were determined at 250 nM of nsp10-nsp16 complex using (A) various concentrations of RNA (as indicated on the plot) and fixed SAM concentration (6  $\mu\text{M}$ ), and (B) varying concentrations of SAM and fixed RNA concentration of 5.6  $\mu\text{M}$  under the optimized condition. The first 10 minutes linear initial velocities from A and B were used to calculate the  $K_m$  values for (C) RNA substrate and (D) SAM. The linearity of the initial velocities was also assessed at 125 nM of nsp10-nsp16 complex (E and F). The velocities at various concentrations of (E) RNA and (F) SAM are shown up to 50 minutes. The linear portion of the initial velocities from E and F are re-plotted and shown in Figure 2A and 2B, respectively. All experiments were performed in triplicate ( $n=3$ )

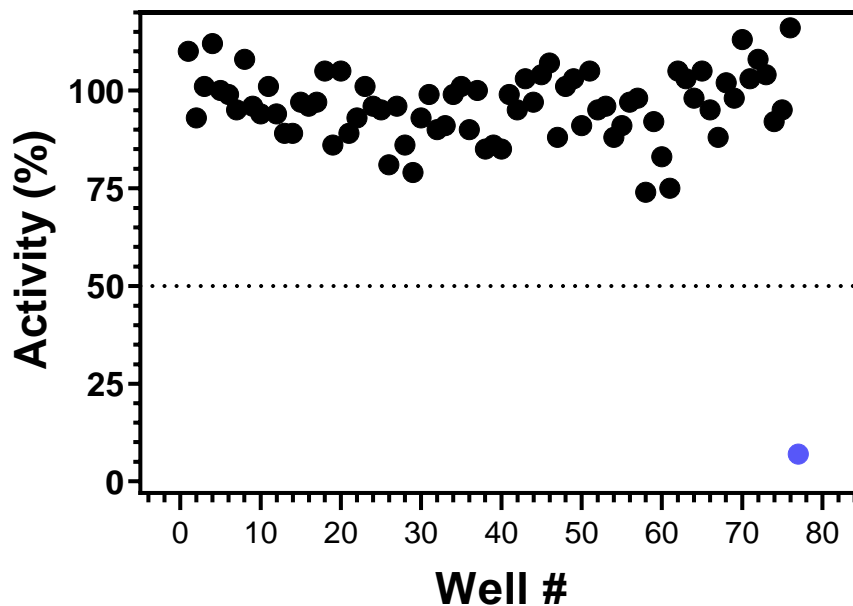

**Supplementary Figure 3. Screening of 76 chemical probes against nsp10-nsp16 complex.** A collection of 76 chemical probes for epigenetic targets including 20 methyltransferase inhibitors were screened at 50  $\mu\text{M}$  against nsp10-nsp16 under the optimized screening assay conditions (i.e., 0.8  $\mu\text{M}$  RNA, 1.7  $\mu\text{M}$  SAM, and 125 nM nsp16 enzyme). The corresponding percentage activity data for each probe is shown on the graph with a black dot. SAH was used at the same concentration as a control (blue dot). Please note that the dotted line marks the 50% activity threshold.

**Supplementary Table 1. 76 chemical probes were screened against nsp10-nsp16 complex.** 76 chemical probes including 20 methyltransferase inhibitors were screened against SARS-CoV-2 nsp10-nsp16 using the optimized HTS assay. The observed percentage of activity of nsp10-nsp16 in the presence of each of these compounds (at 50  $\mu\text{M}$ ) is presented. The list of compounds (available at <https://www.thesgc.org/chemical-probes>), and their specific protein targets are provided. Negative control analogues of the chemical probes are specified with “Negative Ctrl” under the “Specific Targets” column.

| <b>Compound</b> | <b>Specific Targets</b>                         | <b>% activity<br/>@ 50 <math>\mu</math>M</b> |
|-----------------|-------------------------------------------------|----------------------------------------------|
| UNC1215         | L3MBTL3                                         | 103                                          |
| BSP             | pan-Bromodomain                                 | 105                                          |
| UNC0638         | EHMT2 (G9a), EHTM1 (GLP)                        | 102                                          |
| UNC0737         | EHMT2 (G9a), EHTM1 (GLP)<br>(Negative Ctrl)     | 113                                          |
| A-395           | EED                                             | 100                                          |
| A-395N          | EED (Negative Ctrl)                             | 99                                           |
| TP-064          | CARM1 (PRMT4)                                   | 98                                           |
| TP-064N         | CARM1 (PRMT4) (Negative<br>Ctrl)                | 105                                          |
| MS023           | Type I PRMTs (PRMT1,3,4,6,8)                    | 99                                           |
| MS094           | Type I PRMTs (PRMT1,3,4,6,8)<br>(Negative Ctrl) | 103                                          |
| UNC1999         | EZH2                                            | 108                                          |
| UNC2400         | EZH2 (Negative Ctrl)                            | 104                                          |
| PFI-2           | SETD7                                           | 105                                          |
| (S)-PFI-2       | SETD7 (Negative Ctrl)                           | 110                                          |
| SGC-CBP30       | CREBBP, EP300                                   | 103                                          |
| A-366           | EHMT2 (G9a), EHMT1 (GLP)                        | 112                                          |
| OICR-9429       | WDR5                                            | 103                                          |
| OICR-0547       | WDR5 (Negative Ctrl)                            | 101                                          |
| NVS-PAK1-1      | PAK1                                            | 107                                          |
| GSK864          | Mutant isocitrate dehydrogenase<br>1            | 81                                           |
| BI-9321         | NSD3                                            | 97                                           |
| BI-9466         | NSD3 (Negative Ctrl)                            | 105                                          |
| SGC707          | PRMT3                                           | 105                                          |
| XY1             | PRMT3 (Negative Ctrl)                           | 116                                          |
| PFI-3           | SMARCA2, SMARCA4,<br>PBRM1 (PB1)                | 95                                           |
| GSK-J1          | KDM6B (JMJD3), KDM6A<br>(UTX), KDM5B (JARID1B)  | 96                                           |
| A-485           | p300, CBP                                       | 95                                           |
| A-486           | p300, CBP (Negative Ctrl)                       | 108                                          |
| SGC0946         | DOT1L                                           | 97                                           |
| SGC0649         | DOT1L (Negative Ctrl)                           | 91                                           |
| UNC0642         | EHMT2 (G9a), EHTM1 (GLP)                        | 98                                           |
| GSK343          | EZH2                                            | 93                                           |
| L-Moses         | KAT2B (PCAF), KAT2A<br>(GCN5)                   | 100                                          |
| GSK484          | PAD-4                                           | 101                                          |
| BAY-876         | GLUT1                                           | 97                                           |
| BAY-588         | GLUT1 (Negative Ctrl)                           | 94                                           |
| PFI-5           | SMYD2                                           | 88                                           |
| NVS-CECR2-1     | CECR2                                           | 104                                          |
| OF-1            | BRPF1, BRD1 (BRPF2), BRPF3                      | 88                                           |

| <b>Compound</b>   | <b>Specific Targets</b>         | <b>% activity<br/>@ 50 <math>\mu</math>M</b> |
|-------------------|---------------------------------|----------------------------------------------|
| IOX1              | pan-2-OG                        | 99                                           |
| I-BRD9            | BRD9                            | 79                                           |
| LP99              | BRD9, BRD7                      | 85                                           |
| NI-57             | BRPF1, BRD1<br>(BRPF2), BRPF3   | 97                                           |
| I-CBP112          | CREBBP, EP300                   | 93                                           |
| GSK-LSD1          | KDM1A (LSD1)                    | 86                                           |
| GSK2801           | BAZ2A, BAZ2B                    | 89                                           |
| BAZ2-ICR          | BAZ2A, BAZ2B                    | 96                                           |
| PFI-4             | BRPF1B                          | 96                                           |
| A-196             | SUV420H1/H2                     | 93                                           |
| A-197,<br>SGC2043 | SUV420H1/H2<br>(Negative Ctrl)  | 101                                          |
| GSK591            | PRMT5                           | 96                                           |
| SGC2096           | PRMT5 (Negative Ctrl)           | 98                                           |
| IOX2              | pan-2-OG                        | 90                                           |
| PFI-1             | BRD2, BRD3, BRD4,<br>BRDT (BET) | 91                                           |
| JQ1               | BRD2, BRD3, BRD4,<br>BRDT (BET) | 91                                           |
| TP-472            | BRD9, BRD7                      | 88                                           |
| MS049             | PRMT4 (CARM1),<br>PRMT6         | 95                                           |
| BAY-299           | BRD1, TAF1                      | 96                                           |
| TP-238            | CECR2, BPTF (FALZ)              | 95                                           |
| LLY-507           | SMYD2                           | 90                                           |
| BAY-598           | SMYD2                           | 89                                           |
| BAY-369           | SMYD2 (Negative Ctrl)           | 94                                           |
| BI-9564           | BRD9, BRD7                      | 86                                           |
| GSK6853           | BRPF1                           | 95                                           |
| SGC6870           | PRMT6                           | 83                                           |
| SGC6870N          | PRMT6 (Negative Ctrl)           | 75                                           |
| MRK-740           | PRDM9                           | 86                                           |
| MRK-740-NC        | PRDM9 (Negative Ctrl)           | 85                                           |
| SGC3027           | PRMT7                           | 74                                           |
| SGC3027N          | PRMT7 (Negative Ctrl)           | 92                                           |
| UNC6934           | NSD2-PWWP1                      | 92                                           |
| UNC7145           | NSD2-PWWP1<br>(Negative Ctrl)   | 95                                           |
| LLY-283           | PRMT5                           | 99                                           |
| LLY-284           | PRMT5 (Negative Ctrl)           | 101                                          |
| BAY-6035          | SMYD3                           | 89                                           |
| BAY-444           | SMYD3 (Negative Ctrl)           | 101                                          |
| SAH<br>(Control)  | -                               | 7                                            |
